# Supplementary material for: Les Contemplations - Victor Hugo - : réponse à un acte d'accusation
Source: Royal Society of Chemistry journal article supplement (doi:10.1039/d1tb02823e), 2012-05-09
Supplement: d1tb02823e1.pdf [file d1tb02823e1.pdf]

## Supplementary Information

### **Engineering Lipusu by lysophosphatidylcholine for improved tumor cellular uptake and anticancer efficacy**

Lijie Li<sup>a</sup>, Qi Zhan<sup>a</sup>, Kaikai Yi<sup>b</sup>, Ning Chen<sup>a</sup>, Xueping Li<sup>a</sup>, Shixue Yang<sup>b</sup>, Xin Hou<sup>a</sup>, Jin Zhao<sup>a,\*</sup>, Xubo Yuan<sup>a,\*</sup>, and Chunsheng Kang<sup>b,\*</sup>

- a. Tianjin Key Laboratory of Composite and Functional Materials, School of Materials Science and Engineering, Tianjin University, Tianjin 300072, China
- b. Department of Neurosurgery, Tianjin Medical University General Hospital, Laboratory of Neuro-oncology, Tianjin Neurological Institute, Key Laboratory of Post-Neuro Injury Neuro-Repair and Regeneration in Central Nervous System, Ministry of Education and Tianjin City, Tianjin 300052, China

\* Corresponding authors: Jin Zhao, E-mail: [zhaojin@tju.edu.cn](mailto:zhaojin@tju.edu.cn); Xubo Yuan, E-mail: [xbyuan@tju.edu.cn](mailto:xbyuan@tju.edu.cn); Chunsheng Kang, E-mail: [kang97061@tmu.edu.cn](mailto:kang97061@tmu.edu.cn)

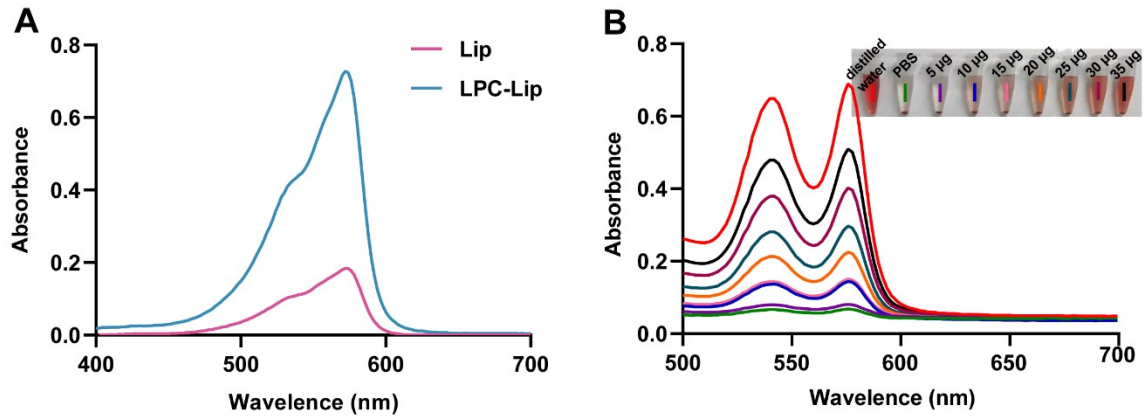

**Fig. S1** (A) Assay of Lysophosphatidylcholine in Lip and LPC-Lip. (B) Hemolytic activities of LPC with different amounts, and comparison with distilled water (positive control) and PBS (negative control).

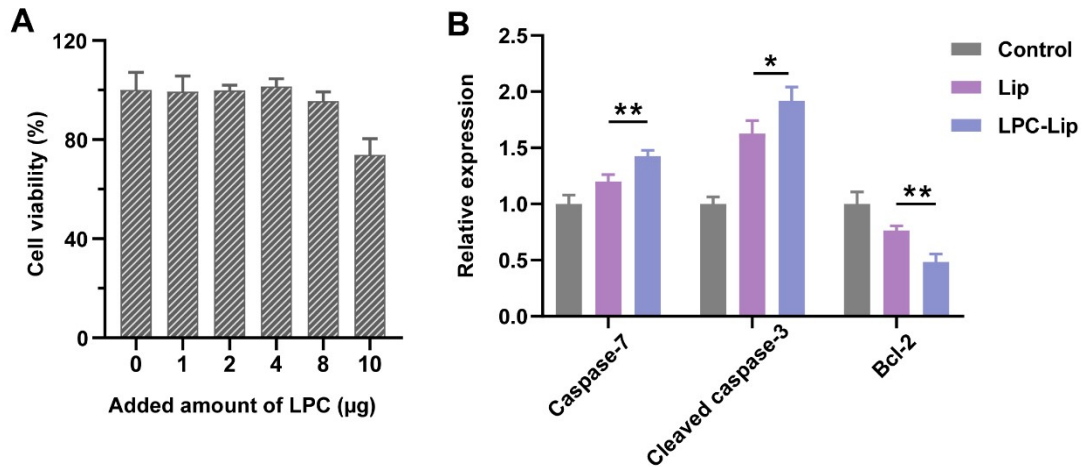

**Fig. S2** (A) Cytotoxicity of LPC with different additions as examined in 4T1 cells. (B) Quantification of relative expression levels of caspase-7, cleaved caspase-3 and Bcl-2. The blots were analyzed by densitometry and normalized to  $\beta$ -Actin. Data are shown as the mean  $\pm$  SD (n=3). The significance levels are shown as \*P<0.05 and \*\*P<0.01.

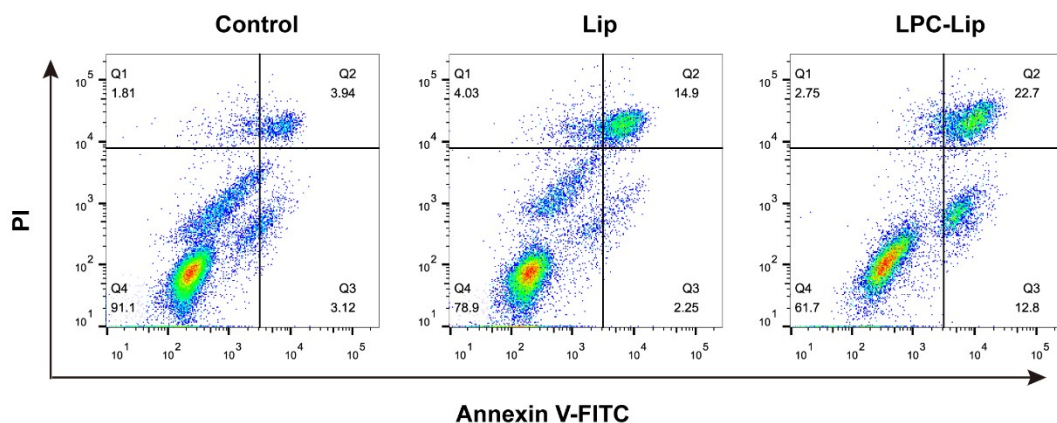

**Fig. S3** Cell apoptosis of 4T1 cells treated with culture medium, Lip and LPC-Lip.

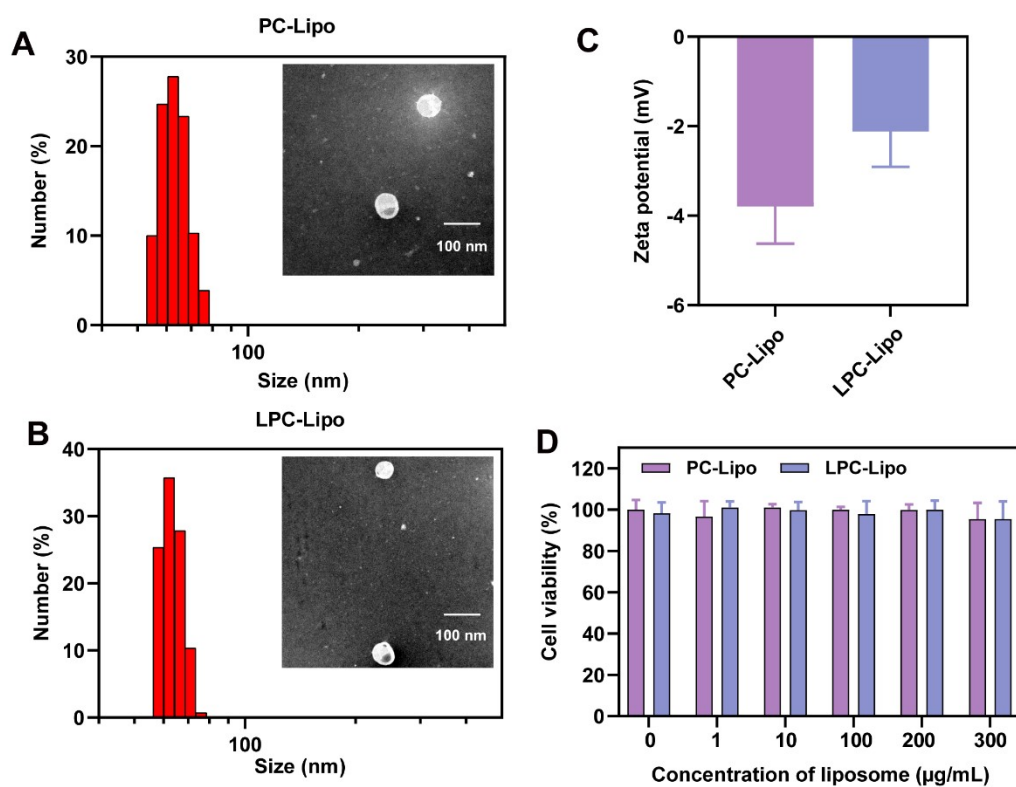

**Fig. S4** Characterization of PC-Lipo and LPC-Lipo. (A, B) The particle size distribution and representative TEM images of PC-Lipo (A) and LPC-Lipo (B). (C) The zeta potential variation of of PC-Lipo and LPC-Lipo. (D) Cytotoxicity of PC-Lipo and LPC-Lipo at different concentrations as examined in 4T1 cells. Data in (C) and (D) are showed as mean  $\pm$  SD (n=3).

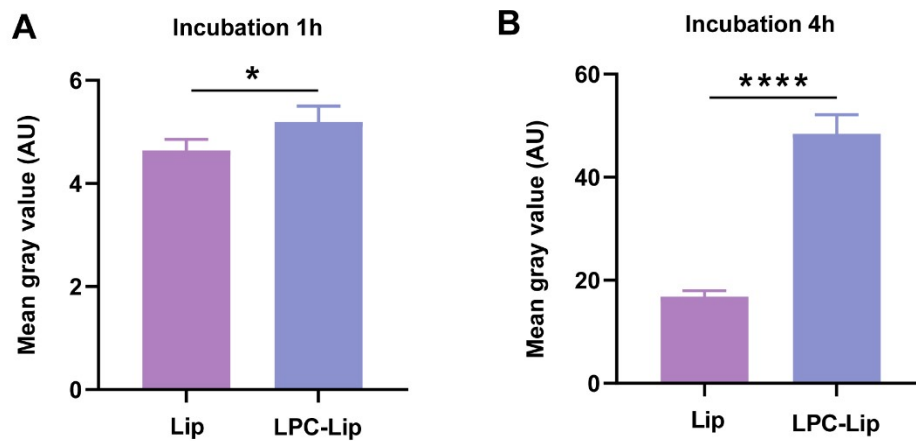

**Fig. S5** Quantification of DiI mean fluorescence intensity in 4T1 cells from Fig. 4A using ImageJ. Data are presented as mean  $\pm$  SD ( $n > 50$  cells per group). The significant levels are shown as  $*P < 0.05$  and  $****p < 0.0001$ .

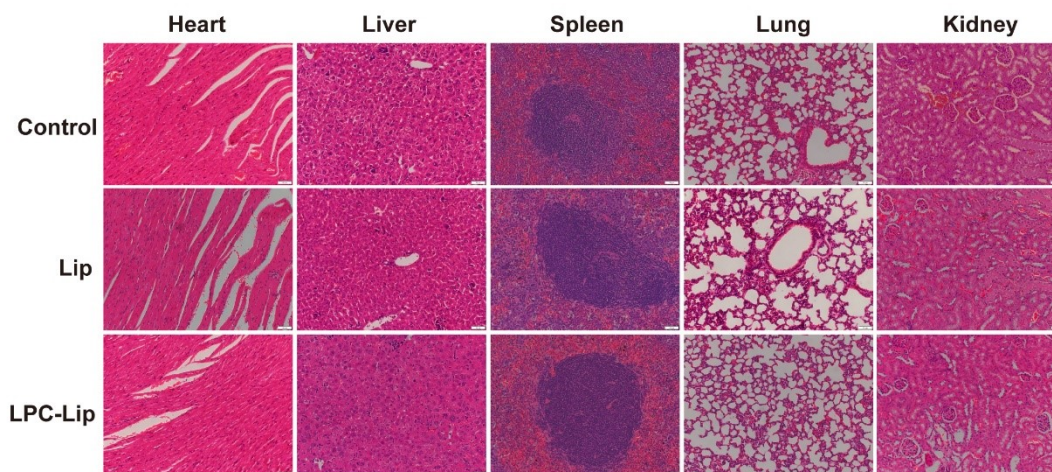

**Fig. S6** Representative H&E-stained images of major organs collected from 4T1 tumor-bearing mice after 17 days of different treatment. Scale bars, 50  $\mu\text{m}$ .
